# Supplementary material for: Photocatalytic properties of hierarchical structures based on Fe-doped BiOBr hollow microspheres
Source: Royal Society of Chemistry journal article supplement (doi:10.1039/c2ta00942k), 2013-01-01
Supplement: c2ta00942k.pdf [file c2ta00942k.pdf]

Electronic Supplementary Information (ESI) available:

## **Photocatalytic Property of Hierarchical Structure Based on Fe-doped BiOBr Hollow Microspheres**

**Guohua Jiang,<sup>\*,a,b</sup> Xiaohong Wang,<sup>a,b</sup> Xiaoguang Xi,<sup>a,b</sup> Ruanbing Hu,<sup>a,b</sup> Xia Li,<sup>a,b</sup> Zhen Wei,<sup>a,b</sup> Bolin Tang,<sup>a,b</sup> Rijing Wang,<sup>a,b</sup> Sheng Wang,<sup>a,b</sup> Tao Wang<sup>a,b</sup> and Wenxing Chen<sup>a,b</sup>**

<sup>a</sup> *Key Laboratory of Advanced Textile Materials and Manufacturing Technology (ATMT), Ministry of Education, Zhejiang Sci-Tech University, Hangzhou 310018, China.*

<sup>b</sup> *Department of Materials Engineering, College of Materials and Textile, Zhejiang Sci-Tech University, Hangzhou 310018, China. Tel: 86 571 86843527; E-mail: polymer\_jiang@hotmail.com*

## 1. Experimental

0.6 g of  $\text{Bi}(\text{NO}_3)_3 \cdot 5\text{H}_2\text{O}$  and appropriate amounts of  $\text{FeCl}_3$  was dissolved in 60 mL of 2-methoxyethanol to form a clean solution, then 1.2 g of CTAB were added slowly to the solution by magnetic stirring. The resultant solution was transferred into a Teflon-lined stainless steel autoclave, followed by a solvothermal treatment at 160 °C for 0-24 h. After cooled to room temperature, the precipitates were washed with deionized water and ethanol six times, dried in a vacuum oven at 60 °C for 12 h.

## 2. Characterization

Structures of the as-prepared samples were analyzed with a SIEMENS Diffraktometer D5000 X-ray diffractometer using  $\text{Cu K}\alpha$  radiation source at 35 kV, with a scan rate of  $0.02^\circ \text{ s}^{-1}$  in the  $2\theta$  range of  $10-80^\circ$ . The morphologies were investigated by ULTRA-55 field-emission scanning electron microscopy (FE-SEM) equipped with an energy dispersive X-ray spectrum (EDS, Inca Energy-200) at an accelerating voltage of 10 kV and JSM-2100 transmission electron microscopy (TEM). The Brunauer-Emmet-Teller (BET) specific surface area of the samples were determined by a high speed automated area and pore size analyzer (F-Sorb3400, China). UV/Vis diffuse reflectance spectra were recorded with a UV-vis spectrometer (U -3010, Hitachi).

## 3. Measurement of photocatalytic activity

The photocatalytic activity of the as-prepared samples was investigated by the photo-degradation of RhB. The photo-degradation experiments were carried out under visible light irradiation whose source was an 11 W daylight lamp (25 Hz) equipped with UV cutoff filter to provide visible light ( $\lambda \geq 400 \text{ nm}$ ). 50 mg of the as-prepared catalysts was suspended in 50 mL RhB aqueous solution ( $C_0 = 10 \text{ mg} \cdot \text{L}^{-1}$ ) with constant stirring. Prior to irradiation, the suspensions were stirred in the dark for 1 h to ensure the adsorption-desorption equilibrium. The temperature of suspensions was maintained below 283 K by a flow of cooling water during the reaction. The change of RhB concentrations (C) in accordance with the irradiation time was measured by JASCO V-570 UV/Vis/NIR spectrophotometer (Japan).

## 4. Electrochemical Measurement

Cyclic voltammetry test of the as-prepared samples was measured on a CHI 660D electrochemical workstation under ambient conditions. A three-electrode cell with 1 M KCl electrolyte was used, in which Pt foil was used as the counter electrode, glass carbon electrode as

the working electrode and an Hg/Hg<sub>2</sub>Cl<sub>2</sub>/KCl electrode as the reference electrode. And cyclic voltammetry was performed between -1.0 V and 0.5 V with scan rates of 20 mV s<sup>-1</sup>, 50 mV s<sup>-1</sup>, 100 mV s<sup>-1</sup>. The photocurrent transient response toward glucose and Nyquist impedance plots were measured in 0.1 M Na<sub>2</sub>SO<sub>4</sub> solution under an 11 W daylight lamp (25 Hz) equipped with UV cutoff filter to provide visible light ( $\lambda \geq 400$  nm) irradiation.

## 5. HR-TEM image

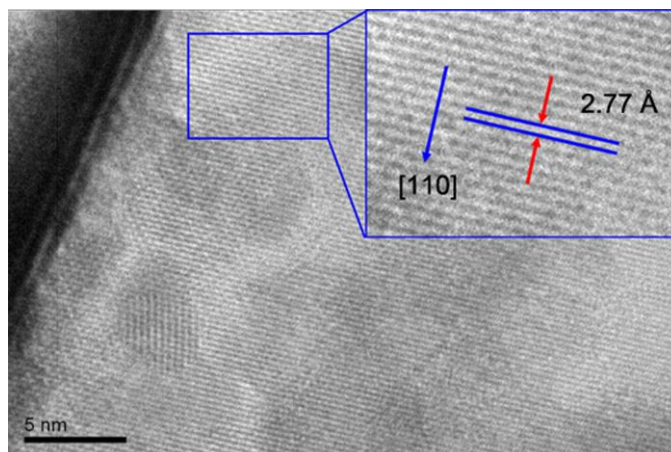

**Figure S1** HR-TEM image of Fe-doped BiOBr samples.

## 6. EDS spectra

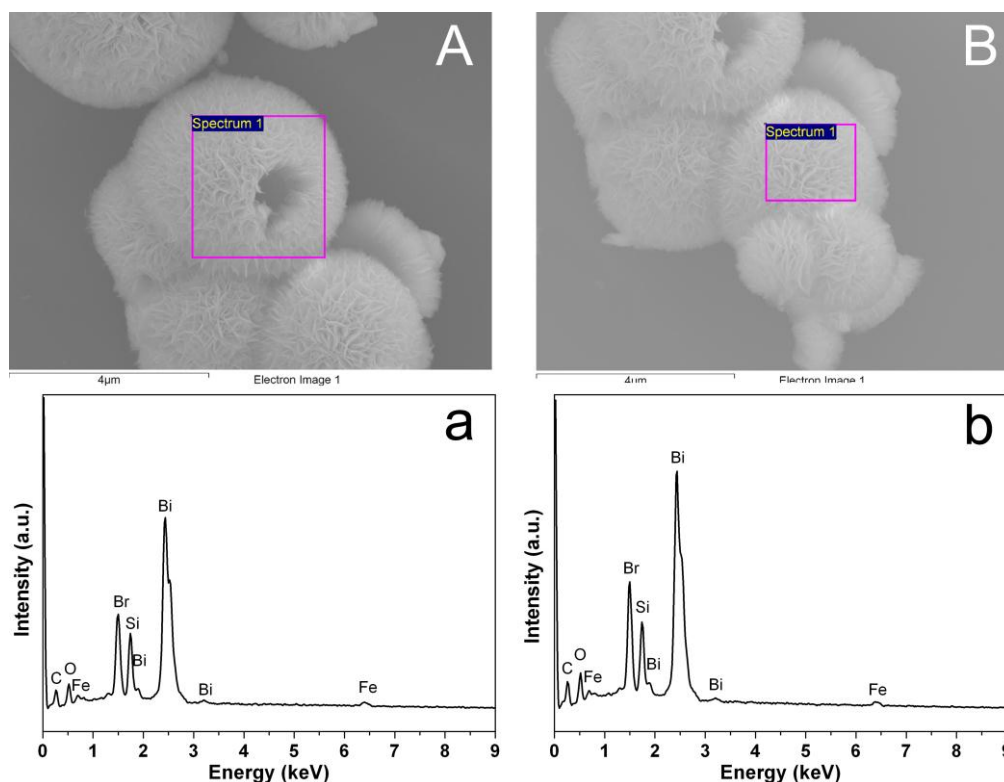

**Figure S2** (A, B) FE-SEM images and (a, b) the corresponding EDS spectra of the different sections on Fe-doped BiOBr microsphere, (A, a) and (B, b).

7. The summary table of each element

| Element | Weight% |
|---------|---------|
| C K     | 7.75    |
| O K     | 8.14    |
| Si K    | 5.27    |
| Fe K    | 4.16    |
| Br L    | 15.21   |
| Bi M    | 59.47   |
| Totals  | 100.00  |

8. Plot of Kubelka-Munk function versus energy

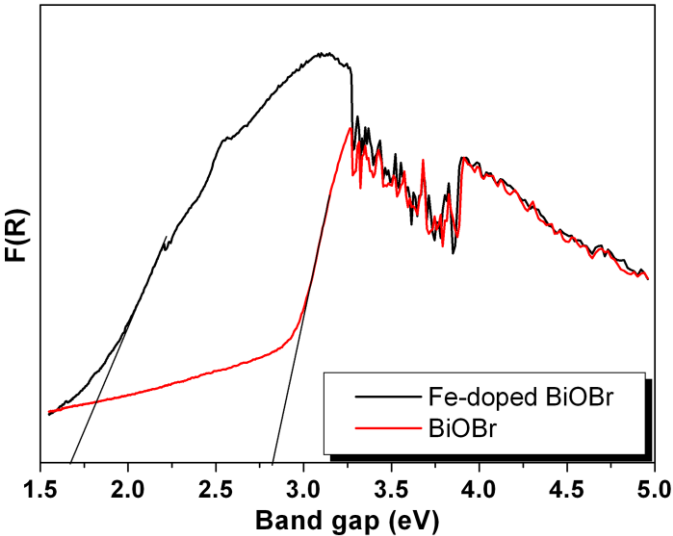

**Figure S3** The plot Kubelka-Munk function versus energy of BiOBr and Fe-doped BiOBr samples.

9. N<sub>2</sub> adsorption-desorption

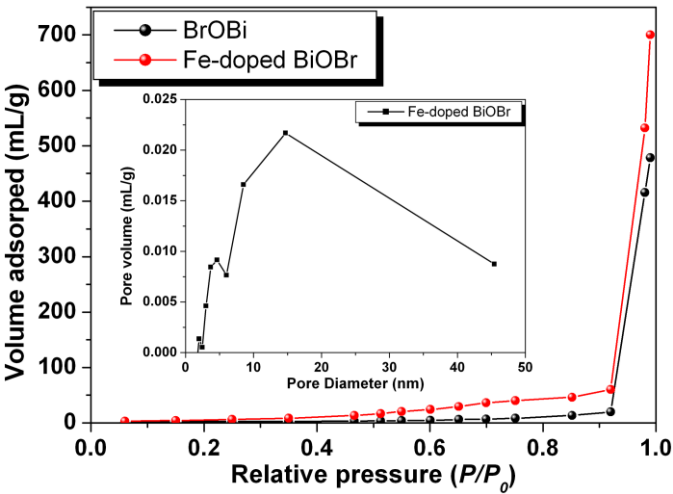

**Figure S4** Nitrogen desorption isotherms and corresponding pore-size distribution of the Fe-doped BiOBr and BiOBr samples.

## 10. XRD patterns

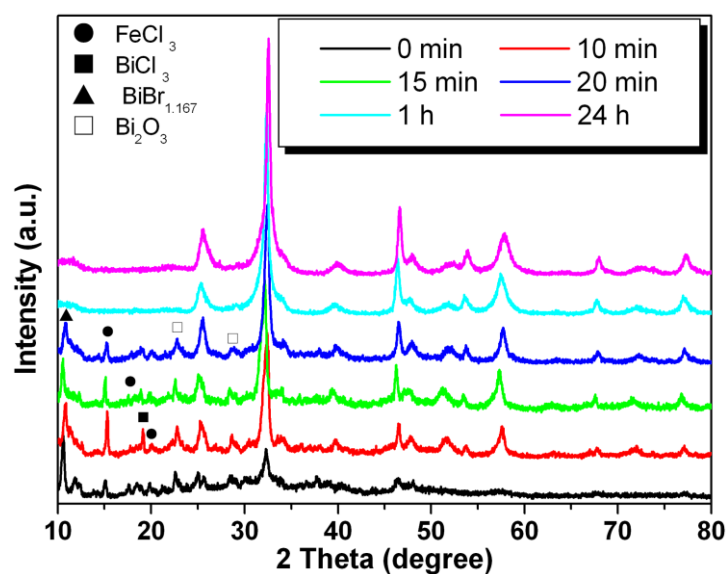

**Figure S5** XRD patterns of the as-prepared Fe-doped BiOBr samples under different stages.

## 11. FE-SEM images and EDS spectra

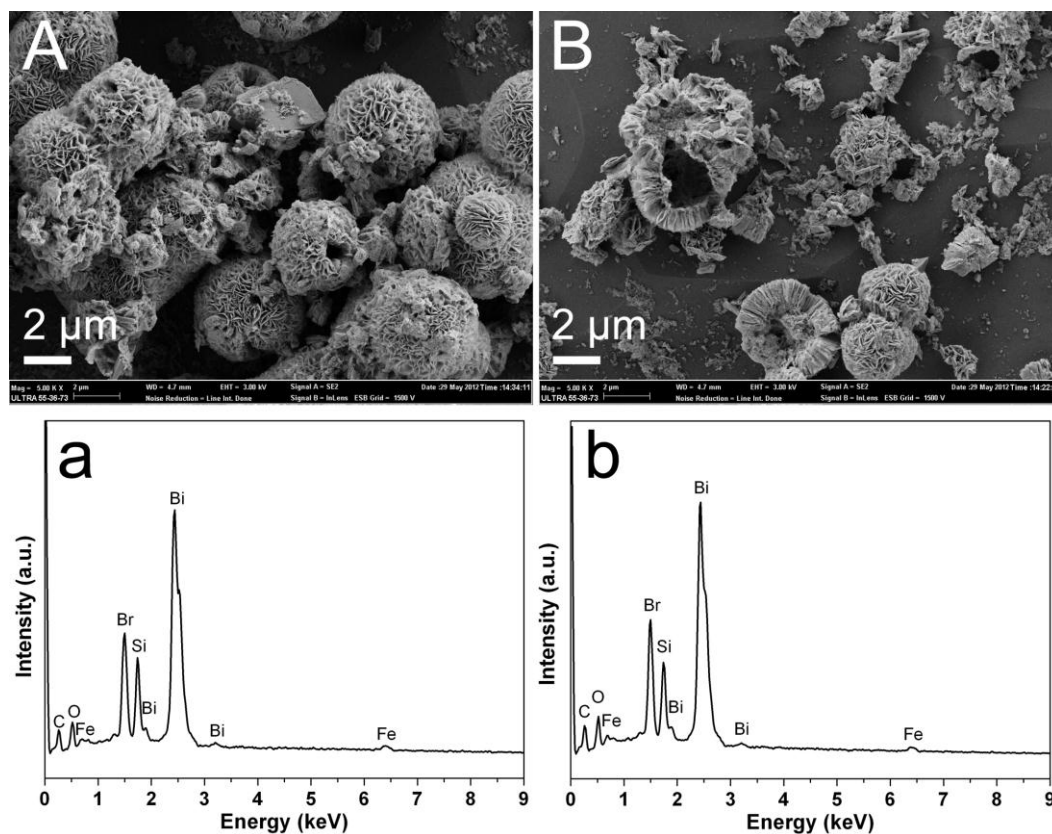

**Figure S6** FE-SEM images and EDS spectra of the Fe-doped BiOBr samples with different Fe doping content, (A, a) 3 % and (B, b) 15 %.

## 12. Cyclic voltammetry curves

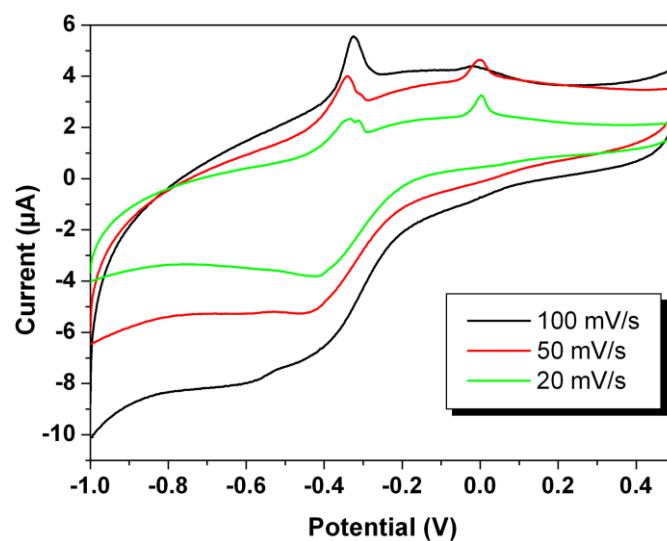

**Figure S7** CV curves of the Fe-doped BiOBr samples in KCl solution at different scan rates from 20 to 100  $\text{mV s}^{-1}$ .

## 13. The plot of photocurrent transient response and Nyquist impedance

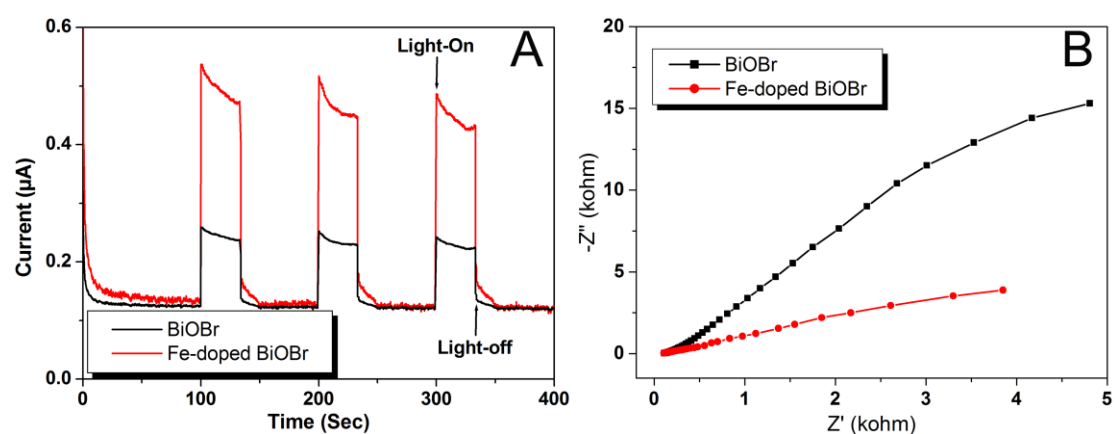

**Figure S8** The photocurrent transient response and Nyquist impedance plots of BiOBr and Fe-doped BiOBr samples in 0.1 M  $\text{Na}_2\text{SO}_4$  solution under visible light irradiation.

#### 14. Cycling degradation test

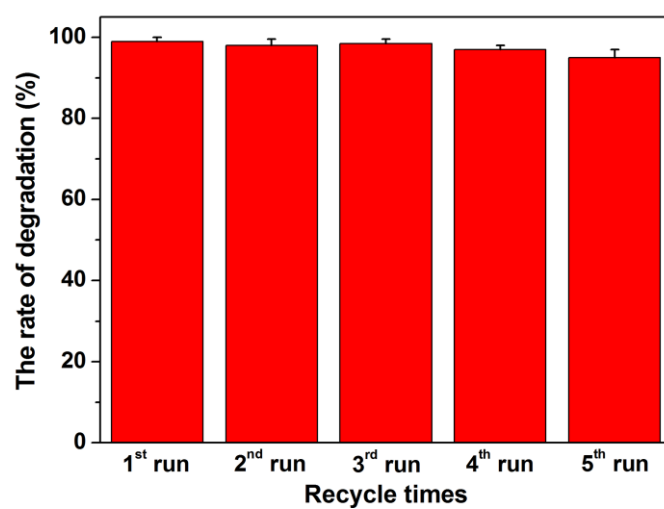

**Figure S9** The rate of the cycling degradation on RhB of Fe-doped BiOBr samples.
